# Supplementary material for: Syntheses, crystal structures and isomerization kinetics of a series of [Co(dtc)2{P(OMe)3 − nPhn}2]+(n = 0–2) complexes (dtc−= N,N-dimethyldithiocarbamate): role of σ-donicity, π-acidity, and cone angle of the P-ligands in the trans influence and trans effect
Source: Royal Society of Chemistry journal article supplement (doi:10.1039/b301712e), 2003-01-01
Supplement: b301712e.doc [file b301712e.doc]

***Supplementary data***

Syntheses, Crystal Structures and Isomerization Kinetics of a Series of [Co(dtc)2{P(OMe)3–nPhn}2]+ (n = 0 – 2) Complexes (dtc– = *N,N*-dimethyldithiocarbamate): Role of -Donicity, -Acidity, and Cone Angle of P-Ligands in the *Trans* Influence and *Trans* Effect

Satoshi Iwatsuki,*a* Shinsaku Kashiwamura,*a* Kazuo Kashiwabara,*a* Takayoshi Suzuki**b* and Hideo D. Takagi**a*

a Department of Chemistry, Graduate School of Science and Research Center for Materials Science, Nagoya University, Nagoya 464-8602, Japan

b Department of Chemistry, Graduate School of Science, Osaka University, Toyonaka 560-0043, Japan

Table S1 Bond lengths (Å) and angles (°) in *cis*-[Co(dtc)2{P(OMe)3}2]BF4.

——————————————————————————————————————

Co–P(1) 2.2003(11) Co–S(1) 2.2745(15) Co–S(2) 2.2937(11)

Co–P(2) 2.2003(11) Co–S(3) 2.2663(15) Co–S(4) 2.2965(11)

S(1)–C(1) 1.714(4) S(2)–C(1) 1.699(4)

S(3)–C(4) 1.717(4) S(4)–C(4) 1.711(4)

P(1)–O(1) 1.585(3) P(1)–O(2) 1.574(3) P(1)–O(3) 1.587(3)

P(2)–O(4) 1.578(3) P(2)–O(5) 1.578(3) P(2)–O(6) 1.586(3)

O(1)–C(23) 1.439(5) O(2)–C(17) 1.464(5) O(3)–C(11) 1.444(5)

O(4)–C(43) 1.437(5) O(5)–C(37) 1.445(5) O(6)–C(31) 1.435(5)

N(1)–C(1) 1.325(5) N(1)–C(2) 1.461(5) N(1)–C(3) 1.461(5)

N(2)–C(4) 1.317(5) N(2)–C(5) 1.467(6) N(2)–C(6) 1.456(6)

C(2)–H(2A) 0.9600 C(2)–H(2B) 0.9600 C(2)–H(2C) 0.9600

C(3)–H(3A) 0.9600 C(3)–H(3B) 0.9600 C(3)–H(3C) 0.9600

C(5)–H(5A) 0.9600 C(5)–H(5B) 0.9600 C(5)–H(5C) 0.9600

C(6)–H(6A) 0.9600 C(6)–H(6B) 0.9600 C(6)–H(6C) 0.9600

C(11)–H(11A) 0.9600 C(11)–H(11B) 0.9600 C(11)–H(11C) 0.9600

C(17)–H(17A) 0.9600 C(17)–H(17B) 0.9600 C(17)–H(17C) 0.9600

C(23)–H(23A) 0.9600 C(23)–H(23B) 0.9600 C(23)–H(23C) 0.9600

C(31)–H(31A) 0.9600 C(31)–H(31B) 0.9600 C(31)–H(31C) 0.9600

C(37)–H(37A) 0.9600 C(37)–H(37B) 0.9600 C(37)–H(37C) 0.9600

C(43)–H(43A) 0.9600 C(43)–H(43B) 0.9600 C(43)–H(43C) 0.9600

F(1)–B(1) 1.322(7) F(2)–B(1) 1.381(6)

F(3)–B(1) 1.368(7) F(4)–B(1) 1.340(7)

S(1)–Co–S(2) 75.59(4) S(3)–Co–S(4) 75.96(4)

S(1)–Co–S(3) 163.13(4) S(2)–Co–S(3) 91.99(5)

S(1)–Co–S(4) 92.53(4) S(2)–Co–S(4) 90.63(4)

S(1)–Co–P(1) 97.73(5) S(1)–Co–P(2) 93.90(5)

S(2)–Co–P(1) 88.70(4) S(2)–Co–P(2) 168.63(4)

S(3)–Co–P(1) 93.30(5) S(3)–Co–P(2) 97.37(5)

S(4)–Co–P(1) 169.21(5) S(4)–Co–P(2) 85.42(4)

P(1)–Co–P(2) 97.16(4)

C(1)–S(1)–Co 87.19(14) C(1)–S(2)–Co 86.92(13)

C(4)–S(3)–Co 87.41(14) C(4)–S(4)–Co 86.60(13)

O(1)–P(1)–Co 121.20(12) O(1)–P(1)–O(2) 104.64(17)

O(2)–P(1)–Co 109.72(11) O(1)–P(1)–O(3) 99.48(17)

O(3)–P(1)–Co 118.15(13) O(2)–P(1)–O(3) 101.11(17)

O(4)–P(2)–Co 113.68(12) O(4)–P(2)–O(5) 107.00(18)

O(5)–P(2)–Co 109.36(11) O(4)–P(2)–O(6) 99.71(16)

O(6)–P(2)–Co 119.44(13) O(5)–P(2)–O(6) 106.64(17)

P(1)–O(1)–C(23) 121.3(3) P(2)–O(4)–C(43) 128.0(3)

P(1)–O(2)–C(17) 120.4(3) P(2)–O(5)–C(37) 123.9(3)

P(1)–O(3)–C(11) 122.5(3) P(2)–O(6)–C(31) 126.4(3)

C(1)–N(1)–C(2) 121.9(4) N(1)–C(1)–S(1) 125.0(3)

C(1)–N(1)–C(3) 121.2(4) N(1)–C(1)–S(2) 124.7(3)

C(2)–N(1)–C(3) 116.9(4) S(1)–C(1)–S(2) 110.3(2)

C(4)–N(2)–C(5) 121.3(4) N(2)–C(4)–S(3) 123.9(3)

C(4)–N(2)–C(6) 121.0(4) N(2)–C(4)–S(4) 126.0(3)

C(5)–N(2)–C(6) 117.7(4) S(3)–C(4)–S(4) 110.0(2)

N(1)–C(2)–H(2A) 109.5 N(1)–C(3)–H(3A) 109.5

N(1)–C(2)–H(2B) 109.5 N(1)–C(3)–H(3B) 109.5

N(1)–C(2)–H(2C) 109.5 N(1)–C(3)–H(3C) 109.5

H(2A)–C(2)–H(2B) 109.5 H(3A)–C(3)–H(3B) 109.5

H(2A)–C(2)–H(2C) 109.5 H(3A)–C(3)–H(3C) 109.5

H(2B)–C(2)–H(2C) 109.5 H(3B)–C(3)–H(3C) 109.5

N(2)–C(5)–H(5A) 109.5 N(2)–C(6)–H(6A) 109.5

N(2)–C(5)–H(5B) 109.5 N(2)–C(6)–H(6B) 109.5

N(2)–C(5)–H(5C) 109.5 N(2)–C(6)–H(6C) 109.5

H(5A)–C(5)–H(5B) 109.5 H(6A)–C(6)–H(6B) 109.5

H(5A)–C(5)–H(5C) 109.5 H(6A)–C(6)–H(6C) 109.5

H(5B)–C(5)–H(5C) 109.5 H(6B)–C(6)–H(6C) 109.5

O(3)–C(11)–H(11A) 109.5 H(11A)–C(11)–H(11B) 109.5

O(3)–C(11)–H(11B) 109.5 H(11A)–C(11)–H(11C) 109.5

O(3)–C(11)–H(11C) 109.5 H(11B)–C(11)–H(11C) 109.5

O(2)–C(17)–H(17A) 109.5 H(17A)–C(17)–H(17B) 109.5

O(2)–C(17)–H(17B) 109.5 H(17A)–C(17)–H(17C) 109.5

O(2)–C(17)–H(17C) 109.5 H(17B)–C(17)–H(17C) 109.5

O(1)–C(23)–H(23A) 109.5 H(23A)–C(23)–H(23B) 109.5

O(1)–C(23)–H(23B) 109.5 H(23A)–C(23)–H(23C) 109.5

O(1)–C(23)–H(23C) 109.5 H(23B)–C(23)–H(23C) 109.5

O(6)–C(31)–H(31A) 109.5 H(31A)–C(31)–H(31B) 109.5

O(6)–C(31)–H(31B) 109.5 H(31A)–C(31)–H(31C) 109.5

O(6)–C(31)–H(31C) 109.5 H(31B)–C(31)–H(31C) 109.5

O(5)–C(37)–H(37A) 109.5 H(37A)–C(37)–H(37B) 109.5

O(5)–C(37)–H(37B) 109.5 H(37A)–C(37)–H(37C) 109.5

O(5)–C(37)–H(37C) 109.5 H(37B)–C(37)–H(37C) 109.5

O(4)–C(43)–H(43A) 109.5 H(43A)–C(43)–H(43B) 109.5

O(4)–C(43)–H(43B) 109.5 H(43A)–C(43)–H(43C) 109.5

O(4)–C(43)–H(43C) 109.5 H(43B)–C(43)–H(43C) 109.5

F(1)–B(1)–F(2) 110.1(4) F(2)–B(1)–F(3) 107.1(5)

F(1)–B(1)–F(3) 111.9(6) F(2)–B(1)–F(4) 111.5(6)

F(1)–B(1)–F(4) 111.1(6) F(3)–B(1)–F(4) 105.0(5)

——————————————————————————————————————

Table S2 Bond lengths (Å) and angles (°) in *cis*-[Co(dtc)2{P(OMe)2Ph}2]PF6.

——————————————————————————————————————

Co–P(1) 2.222(3)Co–S(1) 2.260(2)Co–S(2) 2.285(2)

Co–P(2) 2.214(3)Co–S(3) 2.265(2)Co–S(4) 2.293(3)

S(1)–C(1) 1.728(7) S(2)–C(1) 1.725(7)

S(3)–C(4) 1.707(8)S(4)–C(4) 1.699(8)

P(1)–O(1) 1.596(6)P(1)–O(2) 1.576(6)P(1)–C(11) 1.819(9)

P(2)–O(4) 1.591(6)P(2)–O(5) 1.577(5)P(1)–C(31) 1.818(8)

O(1)–C(23) 1.457(9)O(2)–C(17) 1.273(10)

O(4)–C(43) 1.408(9)O(5)–C(37) 1.457(8)

N(1)–C(1) 1.304(8)N(1)–C(2) 1.450(9)N(1)–C(3) 1.472(8)

N(2)–C(4) 1.316(9)N(2)–C(5) 1.488(10)N(2)–C(6) 1.460(10)

C(11)–C(12) 1.415(11)C(11)–C(16) 1.380(11)C(12)–C(13) 1.414(11)

C(13)–C(14) 1.345(13)C(14)–C(15) 1.374(13) C(15)–C(16) 1.377(12)

C(31)–C(32) 1.392(10)C(31)–C(36) 1.383(10)C(32)–C(33) 1.393(12)

C(33)–C(34) 1.366(12)C(34)–C(35) 1.358(12)C(35)–C(36) 1.419(11)

C(2)–H(2A) 0.9600 C(2)–H(2B) 0.9600 C(2)–H(2C) 0.9600

C(3)–H(3A) 0.9600 C(3)–H(3B) 0.9600 C(3)–H(3C) 0.9600

C(5)–H(5A) 0.9600 C(5)–H(5B) 0.9600 C(5)–H(5C) 0.9600

C(6)–H(6A) 0.9600 C(6)–H(6B) 0.9600 C(6)–H(6C) 0.9600

C(12)–H(12)0.9300 C(13)–H(13) 0.9300 C(14)–H(14)0.9300

C(15)–H(15) 0.9300 C(16)–H(16)0.9300

C(17)–H(17A)0.9600 C(17)–H(17B) 0.9600 C(17)–H(17C)0.9600

C(23)–H(23A)0.9600 C(23)–H(23B) 0.9600 C(23)–H(23C)0.9600

C(32)–H(32)0.9300 C(33)–H(33) 0.9300 C(34)–H(34)0.9300

C(35)–H(35) 0.9300 C(36)–H(36)0.9300

C(37)–H(37A)0.9600 C(37)–H(37B) 0.9600 C(37)–H(37C)0.9600

C(43)–H(43A)0.9600 C(43)–H(43B) 0.9600 C(43)–H(43C)0.9600

P(3)–F(1) 1.495(7)P(3)–F(2) 1.533(8)P(3)–F(3) 1.546(8)

P(3)–F(4) 1.521(8)P(3)–F(5) 1.500(7)P(3)–F(6) 1.534(7)

S(1)–Co–S(2) 76.53(8)S(3)–Co–S(4) 76.35(9)

S(1)–Co–S(3) 166.88(10)S(1)–Co–S(4) 94.10(9)

S(2)–Co–S(3) 93.89(9)S(2)–Co–S(4) 87.67(9)

S(1)–Co–P(1) 90.28(10)S(1)–Co–P(2) 97.81(9)

S(2)–Co–P(1) 88.41(10) S(2)–Co–P(2) 173.72(10)

S(3)–Co–P(1) 98.49(10)S(3)–Co–P(2) 91.26(9)

S(4)–Co–P(1) 173.29(10) S(4)–Co–P(2) 90.06(10)

P(1)–Co–P(2) 94.39(10)

C(1)–S(1)–Co 87.4(3)C(1)–S(2)–Co 86.7(3)

C(4)–S(3)–Co 86.4(3)C(4)–S(4)–Co 85.7(3)

O(1)–P(1)–Co 111.8(2)O(1)–P(1)–O(2) 108.8(3)

O(2)–P(1)–Co 114.4(3)O(1)–P(1)–C(11) 104.1(4)

C(11)–P(1)–Co 118.6(3)O(2)–P(1)–C(11) 97.7(4)

O(4)–P(2)–Co 110.1(3)O(4)–P(2)–O(5) 110.2(3)

O(5)–P(2)–Co 109.6(2)O(4)–P(2)–C(31) 103.1(4)

C(31)–P(2)–Co 118.5(3)O(5)–P(2)–C(31) 105.0(4)

P(1)–O(1)–C(23) 123.3(6)P(1)–O(2)–C(17) 134.9(8)

P(2)–O(4)–C(43) 127.2(6)P(2)–O(5)–C(37) 127.8(5)

C(1)–N(1)–C(2) 121.6(7)C(4)–N(2)–C(5) 120.3(9)

C(1)–N(1)–C(3) 123.0(7)C(4)–N(2)–C(6) 121.0(9)

C(2)–N(1)–C(3) 115.3(6)C(5)–N(2)–C(6) 118.6(8)

N(1)–C(1)–S(1) 126.0(6) N(2)–C(4)–S(3) 124.4(7)

N(1)–C(1)–S(2) 124.7(6) N(2)–C(4)–S(4) 123.9(7)

S(1)–C(1)–S(2) 109.2(4) S(3)–C(4)–S(4) 111.6(5)

P(1)–C(11)–C(12) 118.6(8) P(2)–C(31)–C(32) 121.5(8)

P(1)–C(11)–C(16) 123.9(9) P(2)–C(31)–C(36) 118.0(7)

C(12)–C(11)–C(16) 117.5(9)C(32)–C(31)–C(36) 120.5(8)

C(11)–C(12)–C(13) 118.2(10) C(31)–C(32)–C(33) 119.9(10)

C(12)–C(13)–C(14) 122.2(11)C(32)–C(33)–C(34) 119.5(10)

C(13)–C(14)–C(15) 119.8(11) C(33)–C(34)–C(35) 121.6(10)

C(14)–C(15)–C(16) 119.4(11) C(34)–C(35)–C(36) 120.2(10)

C(15)–C(16)–C(11) 122.9(11) C(35)–C(36)–C(31) 118.3(9)

N(1)–C(2)–H(2A) 109.5 N(1)–C(3)–H(3A) 109.5

N(1)–C(2)–H(2B) 109.5 N(1)–C(3)–H(3B) 109.5

N(1)–C(2)–H(2C) 109.5 N(1)–C(3)–H(3C) 109.5

H(2A)–C(2)–H(2B) 109.5 H(3A)–C(3)–H(3B) 109.5

H(2A)–C(2)–H(2C) 109.5 H(3A)–C(3)–H(3C) 109.5

H(2B)–C(2)–H(2C) 109.5 H(3B)–C(3)–H(3C) 109.5

N(2)–C(5)–H(5A) 109.5 N(2)–C(6)–H(6A) 109.5

N(2)–C(5)–H(5B) 109.5 N(2)–C(6)–H(6B) 109.5

N(2)–C(5)–H(5C) 109.5 N(2)–C(6)–H(6C) 109.5

H(5A)–C(5)–H(5B) 109.5 H(6A)–C(6)–H(6B) 109.5

H(5A)–C(5)–H(5C) 109.5 H(6A)–C(6)–H(6C) 109.5

H(5B)–C(5)–H(5C) 109.5 H(6B)–C(6)–H(6C) 109.5

C(11)–C(12)–H(12) 120.9C(31)–C(32)–H(32) 120.1

C(13)–C(12)–H(12) 120.9 C(33)–C(32)–H(32) 120.1

C(12)–C(13)–H(13) 118.9C(32)–C(33)–H(33) 120.3

C(14)–C(13)–H(13) 118.9 C(34)–C(33)–H(33) 120.3

C(13)–C(14)–H(14) 120.1C(33)–C(34)–H(34) 119.2

C(15)–C(14)–H(14) 120.1 C(35)–C(34)–H(34) 119.2

C(14)–C(15)–H(15) 120.3C(34)–C(35)–H(35) 119.9

C(16)–C(15)–H(15) 120.3 C(36)–C(35)–H(35) 119.9

C(11)–C(16)–H(16) 118.6C(31)–C(36)–H(36) 120.9

C(15)–C(16)–H(16) 118.6 C(35)–C(36)–H(36) 120.9

O(2)–C(17)–H(17A) 109.5 O(1)–C(23)–H(23A) 109.5

O(2)–C(17)–H(17B) 109.5 O(1)–C(23)–H(23B) 109.5

O(2)–C(17)–H(17C) 109.5 O(1)–C(23)–H(23C) 109.5

H(17A)–C(17)–H(17B) 109.5 H(23A)–C(23)–H(23B) 109.5

H(17A)–C(17)–H(17C) 109.5 H(23A)–C(23)–H(23C) 109.5

H(17B)–C(17)–H(17C) 109.5 H(23B)–C(23)–H(23C) 109.5

O(5)–C(37)–H(37A) 109.5 O(4)–C(43)–H(43A) 109.5

O(5)–C(37)–H(37B) 109.5 O(4)–C(43)–H(43B) 109.5

O(5)–C(37)–H(37C) 109.5 O(4)–C(43)–H(43C) 109.5

H(37A)–C(37)–H(37B) 109.5 H(43A)–C(43)–H(43B) 109.5

H(37A)–C(37)–H(37C) 109.5 H(43A)–C(43)–H(43C) 109.5

H(37B)–C(37)–H(37C) 109.5 H(43B)–C(43)–H(43C) 109.5

F(1)–P(3)–F(2) 87.8(6) F(1)–P(3)–F(3) 91.2(5)

F(1)–P(3)–F(4) 95.3(6) F(1)–P(3)–F(5) 88.6(5)

F(1)–P(3)–F(6) 175.6(6) F(2)–P(3)–F(3) 88.5(5)

F(2)–P(3)–F(4) 91.0(6) F(2)–P(3)–F(5) 175.7(6)

F(2)–P(3)–F(6) 88.0(5) F(3)–P(3)–F(4) 173.4(6)

F(3)–P(3)–F(5) 89.2(6) F(3)–P(3)–F(6) 89.8(5)

F(4)–P(3)–F(5) 91.7(5) F(4)–P(3)–F(6) 83.5(5)

F(5)–P(3)–F(6) 95.6(6)

——————————————————————————————————————

Table S3 Bond lengths (Å) and angles (°) in *cis*-[Co(dtc)2{P(OMe)Ph2}2]PF6.

——————————————————————————————————————

Co–P(1) 2.2437(11)Co–S(1) 2.2703(12)Co–S(2) 2.2877(11)

Co–P(2) 2.2456(11)Co–S(3) 2.2712(12)Co–S(4) 2.2972(11)

S(1)–C(1) 1.718(4) S(2)–C(1) 1.709(4)

S(3)–C(4) 1.704(4)S(4)–C(4) 1.709(4)

P(1)–O(1) 1.600(3)P(1)–C(11) 1.818(4) P(1)–C(17) 1.816(4)

P(2)–O(4) 1.608(3)P(1)–C(31) 1.814(4)P(1)–C(37) 1.822(4)

O(1)–C(23) 1.454(5)O(4)–C(43) 1.435(5)

N(1)–C(1) 1.308(4)N(1)–C(2) 1.456(5)N(1)–C(3) 1.464(5)

N(2)–C(4) 1.324(5)N(2)–C(5) 1.450(7)N(2)–C(6) 1.465(6)

C(11)–C(12) 1.399(5)C(11)–C(16) 1.394(5)C(12)–C(13) 1.385(6)

C(13)–C(14) 1.357(6)C(14)–C(15) 1.372(7) C(15)–C(16) 1.374(6)

C(17)–C(18) 1.403(5)C(17)–C(22) 1.390(5)C(18)–C(19) 1.379(6)

C(19)–C(20) 1.368(7)C(20)–C(21) 1.354(7) C(21)–C(22) 1.394(6)

C(31)–C(32) 1.389(5)C(31)–C(36) 1.389(5)C(32)–C(33) 1.386(6)

C(33)–C(34) 1.356(7)C(34)–C(35) 1.371(6)C(35)–C(36) 1.378(6)

C(37)–C(38) 1.389(6)C(37)–C(42) 1.406(6)C(38)–C(39) 1.380(6)

C(39)–C(40) 1.374(6)C(40)–C(41) 1.373(7) C(41)–C(42) 1.373(7)

C(2)–H(2A) 0.9600 C(2)–H(2B) 0.9600 C(2)–H(2C) 0.9600

C(3)–H(3A) 0.9600 C(3)–H(3B) 0.9600 C(3)–H(3C) 0.9600

C(5)–H(5A) 0.9600 C(5)–H(5B) 0.9600 C(5)–H(5C) 0.9600

C(6)–H(6A) 0.9600 C(6)–H(6B) 0.9600 C(6)–H(6C) 0.9600

C(12)–H(12)0.9300 C(13)–H(13) 0.9300 C(14)–H(14)0.9300

C(15)–H(15)0.9300 C(16)–H(16) 0.9300

C(18)–H(18)0.9300 C(19)–H(19) 0.9300 C(20)–H(20)0.9300

C(21)–H(21)0.9300 C(22)–H(22) 0.9300

C(23)–H(23A)0.9600 C(23)–H(23B) 0.9600 C(23)–H(23C)0.9600

C(32)–H(32)0.9300 C(33)–H(33) 0.9300 C(34)–H(34)0.9300

C(35)–H(35)0.9300 C(36)–H(36) 0.9300

C(38)–H(38)0.9300 C(39)–H(39) 0.9300 C(40)–H(40)0.9300

C(41)–H(41)0.9300 C(42)–H(42) 0.9300

C(43)–H(43A)0.9600 C(43)–H(43B) 0.9600 C(43)–H(43C)0.9600

P(3)–F(1) 1.564(4)P(3)–F(2) 1.517(4)P(3)–F(3) 1.468(4)

P(3)–F(4) 1.512(4)P(3)–F(5) 1.487(5)P(3)–F(6) 1.549(4)

S(1)–Co–S(2) 76.13(4)S(3)–Co–S(4) 75.73(4)

S(1)–Co–S(3) 162.42(4)S(1)–Co–S(4) 89.52(4)

S(2)–Co–S(3) 93.57(4)S(2)–Co–S(4) 88.07(4)

S(1)–Co–P(1) 96.59(4)S(1)–Co–P(2) 102.38(4)

S(2)–Co–P(1) 85.89(4) S(2)–Co–P(2) 177.78(4)

S(3)–Co–P(1) 96.83(4)S(3)–Co–P(2) 88.28(4)

S(4)–Co–P(1) 170.12(4) S(4)–Co–P(2) 93.58(4)

P(1)–Co–P(2) 92.68(4)

C(1)–S(1)–Co 86.95(13)C(1)–S(2)–Co 86.60(12)

C(4)–S(3)–Co 87.33(15)C(4)–S(4)–Co 86.36(13)

O(1)–P(1)–Co 113.17(10)O(1)–P(1)–C(11) 102.14(16)

C(11)–P(1)–Co 118.37(12)O(1)–P(1)–C(17) 106.19(17)

C(17)–P(1)–Co 108.93(12)C(11)–P(1)–C(17) 107.20(17)

O(4)–P(2)–Co 108.01(10)O(4)–P(2)–C(31) 103.99(16)

C(31)–P(2)–Co 113.63(13)O(4)–P(2)–C(37) 107.29(16)

C(37)–P(2)–Co 120.25(14)C(31)–P(2)–C(37) 102.36(19)

P(1)–O(1)–C(23) 122.9(3)P(2)–O(4)–C(43) 125.1(3)

C(1)–N(1)–C(2) 121.7(3)C(4)–N(2)–C(5) 120.2(4)

C(1)–N(1)–C(3) 120.7(3)C(4)–N(2)–C(6) 120.7(4)

C(2)–N(1)–C(3) 117.5(3)C(5)–N(2)–C(6) 119.0(4)

N(1)–C(1)–S(1) 124.9(3) N(2)–C(4)–S(3) 124.2(4)

N(1)–C(1)–S(2) 124.9(3) N(2)–C(4)–S(4) 125.3(3)

S(1)–C(1)–S(2) 110.2(2) S(3)–C(4)–S(4) 110.5(2)

P(1)–C(11)–C(12) 117.8(3) P(2)–C(31)–C(32) 120.3(3)

P(1)–C(11)–C(16) 124.9(3) P(2)–C(31)–C(36) 121.2(3)

C(12)–C(11)–C(16) 117.4(4)C(32)–C(31)–C(36) 118.3(4)

C(11)–C(12)–C(13) 120.9(4) C(31)–C(32)–C(33) 120.5(5)

C(12)–C(13)–C(14) 120.3(5)C(32)–C(33)–C(34) 120.4(5)

C(13)–C(14)–C(15) 119.8(5) C(33)–C(34)–C(35) 120.0(5)

C(14)–C(15)–C(16) 120.7(4) C(34)–C(35)–C(36) 120.5(5)

C(15)–C(16)–C(11) 120.7(4) C(35)–C(36)–C(31) 120.3(4)

P(1)–C(17)–C(18) 121.5(3) P(2)–C(37)–C(38) 121.0(3)

P(1)–C(17)–C(22) 119.5(3) P(2)–C(37)–C(42) 121.3(4)

C(18)–C(17)–C(22) 118.4(4)C(38)–C(37)–C(42) 117.8(4)

C(17)–C(18)–C(19) 120.5(4) C(37)–C(38)–C(39) 121.0(4)

C(18)–C(19)–C(20) 119.7(5)C(38)–C(39)–C(40) 120.1(5)

C(19)–C(20)–C(21) 121.3(5) C(39)–C(40)–C(41) 119.9(5)

C(20)–C(21)–C(22) C(40)–C(41)–C(42) 120.4(5)

C(21)–C(22)–C(17) 120.1(4) C(41)–C(42)–C(37) 120.6(5)

N(1)–C(2)–H(2A) 109.5 N(1)–C(3)–H(3A) 109.5

N(1)–C(2)–H(2B) 109.5 N(1)–C(3)–H(3B) 109.5

N(1)–C(2)–H(2C) 109.5 N(1)–C(3)–H(3C) 109.5

H(2A)–C(2)–H(2B) 109.5 H(3A)–C(3)–H(3B) 109.5

H(2A)–C(2)–H(2C) 109.5 H(3A)–C(3)–H(3C) 109.5

H(2B)–C(2)–H(2C) 109.5 H(3B)–C(3)–H(3C) 109.5

N(2)–C(5)–H(5A) 109.5 N(2)–C(6)–H(6A) 109.5

N(2)–C(5)–H(5B) 109.5 N(2)–C(6)–H(6B) 109.5

N(2)–C(5)–H(5C) 109.5 N(2)–C(6)–H(6C) 109.5

H(5A)–C(5)–H(5B) 109.5 H(6A)–C(6)–H(6B) 109.5

H(5A)–C(5)–H(5C) 109.5 H(6A)–C(6)–H(6C) 109.5

H(5B)–C(5)–H(5C) 109.5 H(6B)–C(6)–H(6C) 109.5

C(11)–C(12)–H(12) 119.6C(31)–C(32)–H(32) 119.8

C(13)–C(12)–H(12) 119.6 C(33)–C(32)–H(32) 119.8

C(12)–C(13)–H(13) 119.9C(32)–C(33)–H(33) 119.8

C(14)–C(13)–H(13) 119.9 C(34)–C(33)–H(33) 119.8

C(13)–C(14)–H(14) 120.1C(33)–C(34)–H(34) 120.0

C(15)–C(14)–H(14) 120.1 C(35)–C(34)–H(34) 120.0

C(14)–C(15)–H(15) 119.6C(34)–C(35)–H(35) 119.7

C(16)–C(15)–H(15) 119.6 C(36)–C(35)–H(35) 119.7

C(11)–C(16)–H(16) 119.6C(31)–C(36)–H(36) 119.8

C(15)–C(16)–H(16) 119.6 C(35)–C(36)–H(36) 119.8

C(17)–C(18)–H(18) 119.8C(37)–C(38)–H(38) 119.5

C(19)–C(18)–H(18) 119.8 C(39)–C(38)–H(38) 119.5

C(18)–C(19)–H(19) 120.1C(38)–C(39)–H(39) 119.9

C(20)–C(19)–H(19) 120.1 C(40)–C(39)–H(39) 119.9

C(19)–C(20)–H(20) 119.3C(39)–C(40)–H(40) 120.0

C(21)–C(20)–H(20) 119.3 C(41)–C(40)–H(40) 120.0

C(20)–C(21)–H(21) 120.0C(40)–C(41)–H(41) 119.8

C(22)–C(21)–H(21) 120.0 C(42)–C(41)–H(21) 119.8

C(17)–C(22)–H(22) 120.0C(37)–C(42)–H(42) 119.7

C(21)–C(22)–H(22) 120.0 C(41)–C(42)–H(42) 119.7

O(1)–C(23)–H(23A) 109.5 O(4)–C(43)–H(43A) 109.5

O(1)–C(23)–H(23B) 109.5 O(4)–C(43)–H(43B) 109.5

O(1)–C(23)–H(23C) 109.5 O(4)–C(43)–H(43C) 109.5

H(23A)–C(23)–H(23B) 109.5 H(43A)–C(43)–H(43B) 109.5

H(23A)–C(23)–H(23C) 109.5 H(43A)–C(43)–H(43C) 109.5

H(23B)–C(23)–H(23C) 109.5 H(43B)–C(43)–H(43C) 109.5

F(1)–P(3)–F(2) 87.8(3) F(1)–P(3)–F(3) 90.3(4)

F(1)–P(3)–F(4) 90.2(3) F(1)–P(3)–F(5) 92.3(3)

F(1)–P(3)–F(6) 175.8(3) F(2)–P(3)–F(3) 92.3(4)

F(2)–P(3)–F(4) 86.8(3) F(2)–P(3)–F(5) 177.4(5)

F(2)–P(3)–F(6) 92.3(3) F(3)–P(3)–F(4) 178.9(4)

F(3)–P(3)–F(5) 90.3(4) F(3)–P(3)–F(6) 93.9(4)

F(4)–P(3)–F(5) 90.6(4) F(4)–P(3)–F(6) 85.6(3)

F(5)–P(3)–F(6) 87.5(4)

——————————————————————————————————————

Table S4 Bond lengths (Å) and angles (°) in *trans*-[Co(dtc)2{P(OMe)3}2]BF4.

——————————————————————————————————————

Co(1)–P(1) 2.2389(14)Co(1)–S(1) 2.2727(13)Co(1)–S(2) 2.2737(11)

Co(2)–P(2) 2.2425(13)Co(2)–S(3) 2.2650(13)Co(2)–S(4) 2.2796(14)

S(1)–C(1) 1.710(4) S(2)–C(1) 1.711(4)

S(3)–C(4) 1.703(5) S(4)–C(4) 1.719(5)

P(1)–O(1) 1.582(5) P(1)–O(2) 1.570(5) P(1)–O(3) 1.563(4)

P(2)–O(4) 1.576(3) P(2)–O(5) 1.597(4) P(2)–O(6) 1.560(4)

O(1)–C(23) 1.430(8) O(2)–C(17) 1.400(9) O(3)–C(11) 1.241(13)

O(4)–C(43) 1.451(6) O(5)–C(37) 1.429(9) O(6)–C(31) 1.435(5)

N(1)–C(1) 1.311(5) N(1)–C(2) 1.475(7) N(1)–C(3) 1.470(7)

N(2)–C(4) 1.333(6) N(2)–C(5) 1.472(8) N(2)–C(6) 1.456(7)

C(2)–H(2A) 0.9600 C(2)–H(2B) 0.9600 C(2)–H(2C) 0.9600

C(3)–H(3A) 0.9600 C(3)–H(3B) 0.9600 C(3)–H(3C) 0.9600

C(5)–H(5A) 0.9600 C(5)–H(5B) 0.9600 C(5)–H(5C) 0.9600

C(6)–H(6A) 0.9600 C(6)–H(6B) 0.9600 C(6)–H(6C) 0.9600

C(11)–H(11A) 0.9600 C(11)–H(11B) 0.9600 C(11)–H(11C) 0.9600

C(17)–H(17A) 0.9600 C(17)–H(17B) 0.9600 C(17)–H(17C) 0.9600

C(23)–H(23A) 0.9600 C(23)–H(23B) 0.9600 C(23)–H(23C) 0.9600

C(31)–H(31A) 0.9600 C(31)–H(31B) 0.9600 C(31)–H(31C) 0.9600

C(37)–H(37A) 0.9600 C(37)–H(37B) 0.9600 C(37)–H(37C) 0.9600

C(43)–H(43A) 0.9600 C(43)–H(43B) 0.9600 C(43)–H(43C) 0.9600

F(1)–B(1) 1.339(9) F(2)–B(1) 1.273(9)

F(3)–B(1) 1.226(10) F(4)–B(1) 1.230(10)

P(1)–Co(1)–P(1’) 180.0 P(2)–Co(2)–P(2’) 180.0

S(1)–Co(1)–S(1’) 180.0 S(3)–Co(2)–S(3’) 180.0

S(2)–Co(1)–S(2’) 180.0 S(4)–Co(2)–S(4’) 180.0

S(1)–Co(1)–S(2) 76.42(4) S(3)–Co(2)–S(4) 76.76(5)

S(1)–Co(1)–P(1) 87.59(5) S(3)–Co(2)–P(2) 91.99(5)

S(2)–Co(1)–P(1) 88.25(5) S(4)–Co(2)–P(2) 86.30(5)

C(1)–S(1)–Co(1) 86.34(15) C(4)–S(3)–Co(2) 86.49(17)

C(1)–S(2)–Co(1) 86.28(14) C(4)–S(4)–Co(2) 85.66(16)

O(1)–P(1)–Co(1) 111.94(18) O(4)–P(2)–Co(2) 119.18(15)

O(2)–P(1)–Co(1) 118.44(19) O(5)–P(2)–Co(2) 113.94(15)

O(3)–P(1)–Co(1) 116.72(18) O(6)–P(2)–Co(2) 113.22(15)

O(1)–P(1)–O(2) 99.6(3) O(4)–P(2)–O(5) 99.0(2)

O(1)–P(1)–O(3) 106.7(3) O(4)–P(2)–O(6) 106.2(2)

O(2)–P(1)–O(3) 101.5(3) O(5)–P(2)–O(6) 103.3(3)

P(1)–O(1)–C(23) 125.2(6) P(2)–O(4)–C(43) 120.7(3)

P(1)–O(2)–C(17) 122.2(6) P(2)–O(5)–C(37) 125.0(4)

P(1)–O(3)–C(11) 138.6(9) P(2)–O(6)–C(31) 124.3(4)

C(1)–N(1)–C(2) 120.5(4) C(4)–N(2)–C(5) 120.4(5)

C(1)–N(1)–C(3) 122.6(4) C(4)–N(2)–C(6) 122.3(5)

C(2)–N(1)–C(3) 116.8(4) C(5)–N(2)–C(6) 117.3(5)

N(1)–C(1)–S(1) 124.4(4) N(2)–C(4)–S(3) 125.0(4)

N(1)–C(1)–S(2) 125.0(3) N(2)–C(4)–S(4) 123.9(4)

S(1)–C(1)–S(2) 110.6(2) S(3)–C(4)–S(4) 111.1(3)

N(1)–C(2)–H(2A) 109.5 N(1)–C(3)–H(3A) 109.5

N(1)–C(2)–H(2B) 109.5 N(1)–C(3)–H(3B) 109.5

N(1)–C(2)–H(2C) 109.5 N(1)–C(3)–H(3C) 109.5

H(2A)–C(2)–H(2B) 109.5 H(3A)–C(3)–H(3B) 109.5

H(2A)–C(2)–H(2C) 109.5 H(3A)–C(3)–H(3C) 109.5

H(2B)–C(2)–H(2C) 109.5 H(3B)–C(3)–H(3C) 109.5

N(2)–C(5)–H(5A) 109.5 N(2)–C(6)–H(6A) 109.5

N(2)–C(5)–H(5B) 109.5 N(2)–C(6)–H(6B) 109.5

N(2)–C(5)–H(5C) 109.5 N(2)–C(6)–H(6C) 109.5

H(5A)–C(5)–H(5B) 109.5 H(6A)–C(6)–H(6B) 109.5

H(5A)–C(5)–H(5C) 109.5 H(6A)–C(6)–H(6C) 109.5

H(5B)–C(5)–H(5C) 109.5 H(6B)–C(6)–H(6C) 109.5

O(3)–C(11)–H(11A) 109.5 H(11A)–C(11)–H(11B) 109.5

O(3)–C(11)–H(11B) 109.5 H(11A)–C(11)–H(11C) 109.5

O(3)–C(11)–H(11C) 109.5 H(11B)–C(11)–H(11C) 109.5

O(2)–C(17)–H(17A) 109.5 H(17A)–C(17)–H(17B) 109.5

O(2)–C(17)–H(17B) 109.5 H(17A)–C(17)–H(17C) 109.5

O(2)–C(17)–H(17C) 109.5 H(17B)–C(17)–H(17C) 109.5

O(1)–C(23)–H(23A) 109.5 H(23A)–C(23)–H(23B) 109.5

O(1)–C(23)–H(23B) 109.5 H(23A)–C(23)–H(23C) 109.5

O(1)–C(23)–H(23C) 109.5 H(23B)–C(23)–H(23C) 109.5

O(6)–C(31)–H(31A) 109.5 H(31A)–C(31)–H(31B) 109.5

O(6)–C(31)–H(31B) 109.5 H(31A)–C(31)–H(31C) 109.5

O(6)–C(31)–H(31C) 109.5 H(31B)–C(31)–H(31C) 109.5

O(5)–C(37)–H(37A) 109.5 H(37A)–C(37)–H(37B) 109.5

O(5)–C(37)–H(37B) 109.5 H(37A)–C(37)–H(37C) 109.5

O(5)–C(37)–H(37C) 109.5 H(37B)–C(37)–H(37C) 109.5

O(4)–C(43)–H(43A) 109.5 H(43A)–C(43)–H(43B) 109.5

O(4)–C(43)–H(43B) 109.5 H(43A)–C(43)–H(43C) 109.5

O(4)–C(43)–H(43C) 109.5 H(43B)–C(43)–H(43C) 109.5

F(1)–B(1)–F(2) 112.0(7) F(2)–B(1)–F(3) 110.0(9)

F(1)–B(1)–F(3) 103.4(8) F(2)–B(1)–F(4) 108.2(9)

F(1)–B(1)–F(4) 109.7(9) F(3)–B(1)–F(4) 113.6(10)

——————————————————————————————————————

Table S5 Bond lengths (Å) and angles (°) in *trans*-[Co(dtc)2{P(OMe)2Ph}2]BF4•Me2CO.

——————————————————————————————————————

Co(1)–P(1) 2.2632(15)Co(1)–S(1) 2.2587(12)Co(1)–S(2) 2.2675(12)

Co(2)–P(2) 2.2688(14)Co(2)–S(3) 2.2684(12)Co(2)–S(4) 2.2647(12)

S(1)–C(1) 1.719(6) S(2)–C(1) 1.724(5)

S(3)–C(4) 1.719(5)S(4)–C(4) 1.705(5)

P(1)–O(1) 1.600(4)P(1)–O(2) 1.597(3)P(1)–C(11) 1.796(5)

O(1)–C(23) 1.414(5)O(2)–C(17) 1.442(5)

P(2)–O(4) 1.605(3)P(2)–O(5) 1.598(3)P(2)–C(31) 1.835(5)

O(4)–C(43) 1.429(5)O(5)–C(37) 1.456(5)

N(1)–C(1) 1.315(6)N(1)–C(2) 1.466(6)N(1)–C(3) 1.474(6)

N(2)–C(4) 1.303(5)N(2)–C(5) 1.465(6)N(2)–C(6) 1.485(6)

C(11)–C(12) 1.391(6) C(12)–C(13) 1.398(7) C(13)–C(14) 1.383(7)

C(14)–C(15) 1.398(7)C(15)–C(16) 1.391(6)C(11)–C(16) 1.391(6)

C(31)–C(32) 1.384(6) C(32)–C(33) 1.387(7) C(33)–C(34) 1.356(9)

C(34)–C(35) 1.372(9)C(35)–C(36) 1.367(7)C(31)–C(36) 1.408(6)

C(2)–H(2A) 0.9600 C(2)–H(2B) 0.9600 C(2)–H(2C) 0.9600

C(3)–H(3A) 0.9600 C(3)–H(3B) 0.9600 C(3)–H(3C) 0.9600

C(5)–H(5A) 0.9600 C(5)–H(5B) 0.9600 C(5)–H(5C) 0.9600

C(6)–H(6A) 0.9600 C(6)–H(6B) 0.9600 C(6)–H(6C) 0.9600

C(12)–H(12)0.9300C(13)–H(13) 0.9300 C(14)–H(14)0.9300

C(15)–H(15) 0.9300 C(16)–H(16)0.9300

C(17)–H(17A)0.9600C(17)–H(17B) 0.9600 C(17)–H(17C)0.9600

C(23)–H(23A)0.9600C(23)–H(23B) 0.9600 C(23)–H(23C)0.9600

C(32)–H(32)0.9300C(33)–H(33) 0.9300 C(34)–H(34)0.9300

C(35)–H(35) 0.9300 C(36)–H(36)0.9300

C(37)–H(37A)0.9600C(37)–H(37B) 0.9600 C(37)–H(37C)0.9600

C(43)–H(43A)0.9600C(43)–H(43B) 0.9600 C(43)–H(43C)0.9600

B–F(1) 1.451(11)B–F(2) 1.258(11)

B–F(3) 1.307(9) B–F(4) 1.255(11)

O(51)–C(51)1.175(8)C(51)–C(52) 1.497(9) C(51)–C(53)1.446(9)

C(52)–H(52A)0.9600C(52)–H(52B) 0.9600 C(52)–H(52C)0.9600

C(53)–H(53A)0.9600C(53)–H(53B) 0.9600 C(53)–H(53C)0.9600

S(1)–Co(1)–S(2) 76.89(5)S(3)–Co(2)–S(4) 76.99(5)

S(1)–Co(1)–P(1) 91.61(5)S(3)–Co(2)–P(2) 91.43(5)

S(2)–Co(1)–P(1) 85.25(5) S(4)–Co(2)–P(2) 85.36(5)

C(1)–S(1)–Co(1) 86.89(18)C(4)–S(3)–Co(2) 85.76(16)

C(1)–S(2)–Co(1) 86.5(2) C(4)–S(4)–Co(2) 86.19(16)

O(1)–P(1)–Co(1) 119.92(15)O(4)–P(2)–Co(2) 118.92(14)

O(2)–P(1)–Co(1) 110.12(15)O(5)–P(2)–Co(2) 109.13(14)

C(11)–P(1)–Co(1) 118.13(18)C(31)–P(2)–Co(2) 117.81(18)

O(1)–P(1)–O(2) 106.32(19)O(4)–P(2)–O(5) 106.66(18)

O(1)–P(1)–C(11) 96.6(2)O(4)–P(2)–C(31) 97.0(2)

O(2)–P(1)–C(11) 103.8(2)O(5)–P(2)–C(31) 106.0(2)

P(1)–O(1)–C(23) 124.7(4)P(2)–O(4)–C(43) 125.9(3)

P(1)–O(2)–C(17) 121.9(3)P(2)–O(5)–C(37) 120.9(3)

C(1)–N(1)–C(2) 120.0(5)C(4)–N(2)–C(5) 123.0(5)

C(1)–N(1)–C(3) 121.3(5)C(4)–N(2)–C(6) 121.2(5)

C(2)–N(1)–C(3) 118.6(5)C(5)–N(2)–C(6) 115.7(4)

N(1)–C(1)–S(1) 126.1(4) N(2)–C(4)–S(3) 123.3(4)

N(1)–C(1)–S(2) 124.2(5) N(2)–C(4)–S(4) 125.7(4)

S(1)–C(1)–S(2) 109.6(3) S(3)–C(4)–S(4) 111.0(2)

P(1)–C(11)–C(12) 123.6(4) P(2)–C(31)–C(32) 117.5(5)

P(1)–C(11)–C(16) 120.0(4) P(2)–C(31)–C(36) 121.5(5)

C(12)–C(11)–C(16) 116.4(5)C(32)–C(31)–C(36) 121.0(5)

C(11)–C(12)–C(13) 122.9(5) C(31)–C(32)–C(33) 118.0(6)

C(12)–C(13)–C(14) 118.2(6) C(32)–C(33)–C(34) 122.4(7)

C(13)–C(14)–C(15) 121.4(6) C(33)–C(34)–C(35) 118.4(6)

C(14)–C(15)–C(16) 117.9(5)C(34)–C(35)–C(36) 122.8(6)

C(15)–C(16)–C(11) 123.2(5) C(35)–C(36)–C(31) 117.5(6)

N(1)–C(2)–H(2A) 109.5 N(2)–C(5)–H(5A) 109.5

N(1)–C(2)–H(2B) 109.5 N(2)–C(5)–H(5B) 109.5

N(1)–C(2)–H(2C) 109.5 N(2)–C(5)–H(5C) 109.5

H(2A)–C(2)–H(2B) 109.5 H(5A)–C(5)–H(5B) 109.5

H(2A)–C(2)–H(2C) 109.5 H(5A)–C(5)–H(5C) 109.5

H(2B)–C(2)–H(2C) 109.5 H(5B)–C(5)–H(5C) 109.5

N(1)–C(3)–H(3A) 109.5 N(2)–C(6)–H(6A) 109.5

N(1)–C(3)–H(3B) 109.5 N(2)–C(6)–H(6B) 109.5

N(1)–C(3)–H(3C) 109.5 N(2)–C(6)–H(6C) 109.5

H(3A)–C(3)–H(3B) 109.5 H(6A)–C(6)–H(6B) 109.5

H(3A)–C(3)–H(3C) 109.5 H(6A)–C(6)–H(6C) 109.5

H(3B)–C(3)–H(3C) 109.5 H(6B)–C(6)–H(6C) 109.5

O(1)–C(23)–H(23A) 109.5 O(4)–C(43)–H(43A) 109.5

O(1)–C(23)–H(23B) 109.5 O(4)–C(43)–H(43B) 109.5

O(1)–C(23)–H(23C) 109.5 O(4)–C(43)–H(43C) 109.5

H(23A)–C(23)–H(23B) 109.5 H(43A)–C(43)–H(43B) 109.5

H(23A)–C(23)–H(23C) 109.5 H(43A)–C(43)–H(43C) 109.5

H(23B)–C(23)–H(23C) 109.5 H(43B)–C(43)–H(43C) 109.5

O(2)–C(17)–H(17A) 109.5 O(5)–C(37)–H(37A) 109.5

O(2)–C(17)–H(17B) 109.5 O(5)–C(37)–H(37B) 109.5

O(2)–C(17)–H(17C) 109.5 O(5)–C(37)–H(37C) 109.5

H(17A)–C(17)–H(17B) 109.5 H(37A)–C(37)–H(37B) 109.5

H(17A)–C(17)–H(17C) 109.5 H(37A)–C(37)–H(37C) 109.5

H(17B)–C(17)–H(17C) 109.5 H(37B)–C(37)–H(37C) 109.5

C(11)–C(12)–H(12) 118.5 C(31)–C(32)–H(32) 121.0

C(13)–C(12)–H(12) 118.5 C(33)–C(32)–H(32) 121.0

C(12)–C(13)–H(13) 120.9 C(32)–C(33)–H(33) 118.8

C(14)–C(13)–H(13) 120.9 C(34)–C(33)–H(33) 118.8

C(13)–C(14)–H(14) 119.3 C(33)–C(34)–H(34) 120.8

C(15)–C(14)–H(14) 119.3 C(35)–C(34)–H(34) 120.8

C(14)–C(15)–H(15) 121.0 C(34)–C(35)–H(35) 118.6

C(16)–C(15)–H(15) 121.0 C(36)–C(35)–H(35) 118.6

C(15)–C(16)–H(16) 118.4 C(35)–C(36)–H(36) 121.3

C(11)–C(16)–H(16) 118.4 C(31)–C(36)–H(36) 121.3

F(1)–B–F(2) 99.4(9) F(1)–B–F(3) 97.8(6)

F(1)–B–F(4) 100.4(12) F(2)–B–F(3) 111.5(11)

F(2)–B–F(4) 128.4(8) F(3)–B–F(4) 112.3(10)

——————————————————————————————————————

Table S6 Bond lengths (Å) and angles (°) in *trans*-[Co(dtc)2{P(OMe)Ph2}2]BF4•0.5CH3OH.

——————————————————————————————————————

Co(1)–P(1) 2.2686(19)Co(1)–S(1) 2.2788(18)Co(1)–S(2) 2.2801(19)

Co(1)–P(2) 2.3090(19)Co(1)–S(3) 2.2805(18)Co(1)–S(4) 2.275(2)

S(1)–C(1) 1.716(7) S(2)–C(1) 1.717(7)O(1)–C(23) 1.431(8)

S(3)–C(4) 1.720(7)S(4)–C(4) 1.729(7)O(4)–C(43) 1.469(8)

P(1)–O(1) 1.611(5)P(1)–C(11) 1.822(7) P(1)–C(17) 1.826(6)

P(2)–O(4) 1.611(5)P(2)–C(31) 1.829(7) P(2)–C(37) 1.831(8)

N(1)–C(1) 1.314(8)N(1)–C(2) 1.481(9)N(1)–C(3) 1.468(10)

N(2)–C(4) 1.308(8)N(2)–C(5) 1.466(9)N(2)–C(6) 1.463(9)

C(11)–C(12) 1.384(10) C(12)–C(13) 1.399(10) C(13)–C(14) 1.382(12)

C(14)–C(15) 1.378(12)C(15)–C(16) 1.389(10)C(11)–C(16) 1.405(9)

C(17)–C(18) 1.394(9) C(18)–C(19) 1.394(9) C(19)–C(20) 1.377(10)

C(20)–C(21) 1.377(11)C(21)–C(22) 1.412(10)C(17)–C(22) 1.395(9)

C(31)–C(32) 1.385(11) C(32)–C(33) 1.407(12) C(33)–C(34) 1.363(15)

C(34)–C(35) 1.362(15)C(35)–C(36) 1.411(12)C(31)–C(36) 1.391(11)

C(37)–C(38) 1.389(11) C(38)–C(39) 1.398(13) C(39)–C(40) 1.388(18)

C(40)–C(41) 1.358(18)C(41)–C(42) 1.377(14)C(37)–C(42) 1.389(11)

C(2)–H(2A) 0.9600 C(2)–H(2B) 0.9600 C(2)–H(2C) 0.9600

C(3)–H(3A) 0.9600 C(3)–H(3B) 0.9600 C(3)–H(3C) 0.9600

C(5)–H(5A) 0.9600 C(5)–H(5B) 0.9600 C(5)–H(5C) 0.9600

C(6)–H(6A) 0.9600 C(6)–H(6B) 0.9600 C(6)–H(6C) 0.9600

C(12)–H(12)0.9300C(13)–H(13) 0.9300 C(14)–H(14)0.9300

C(15)–H(15) 0.9300 C(16)–H(16)0.9300

C(18)–H(18)0.9300C(19)–H(19) 0.9300 C(20)–H(20)0.9300

C(21)–H(21) 0.9300 C(22)–H(22)0.9300

C(23)–H(23A)0.9600C(23)–H(23B) 0.9600 C(23)–H(23C)0.9600

C(32)–H(32)0.9300C(33)–H(33) 0.9300 C(34)–H(34)0.9300

C(35)–H(35) 0.9300 C(36)–H(36)0.9300

C(38)–H(38)0.9300C(39)–H(39) 0.9300 C(40)–H(40)0.9300

C(41)–H(41) 0.9300 C(42)–H(42)0.9300

C(43)–H(43A)0.9600C(43)–H(43B) 0.9600 C(43)–H(43C)0.9600

Co(51)–P(51) 2.2848(18)Co(51)–S(51) 2.2848(15)Co(51)–S(52) 2.2798(17)

S(51)–C(51) 1.712(7) S(52)–C(51) 1.714(6)O(51)–C(73) 1.386(9)

P(51)–O(51) 1.613(5)P(51)–C(61) 1.822(7) P(51)–C(67) 1.833(6)

N(51)–C(51) 1.322(8)N(51)–C(52) 1.456(9)N(51)–C(53) 1.463(9)

C(52)–H(52A) 0.9600 C(52)–H(52B) 0.9600 C(52)–H(52C) 0.9600

C(53)–H(53A) 0.9600 C(53)–H(53B) 0.9600 C(53)–H(53C) 0.9600

C(61)–C(62) 1.394(10) C(62)–C(63) 1.395(10) C(63)–C(64) 1.383(13)

C(64)–C(65) 1.359(13)C(65)–C(66) 1.405(11)C(61)–C(66) 1.396(10)

C(67)–C(68) 1.380(9) C(68)–C(69) 1.384(9) C(69)–C(70) 1.376(11)

C(70)–C(71) 1.370(12)C(71)–C(72) 1.382(11)C(67)–C(72) 1.401(10)

C(62)–H(62)0.9300C(63)–H(63) 0.9300 C(64)–H(64)0.9300

C(65)–H(65) 0.9300 C(66)–H(66)0.9300

C(68)–H(68)0.9300C(69)–H(69) 0.9300 C(70)–H(70)0.9300

C(71)–H(71) 0.9300 C(72)–H(72)0.9300

C(73)–H(73A)0.9600C(73)–H(73B) 0.9600 C(73)–H(73C)0.9600

Co(52)–P(52) 2.3007(16)Co(52)–S(53) 2.2700(17)Co(52)–S(54) 2.2710(16)

S(53)–C(54) 1.718(7)S(54)–C(54) 1.718(7)O(54)–C(93) 1.465(8)

P(52)–O(54) 1.619(4)P(52)–C(81) 1.818(7) P(52)–C(87) 1.843(7)

N(52)–C(54) 1.320(8)N(52)–C(55) 1.463(10)N(52)–C(56) 1.466(9)

C(55)–H(55A) 0.9600 C(55)–H(55B) 0.9600 C(55)–H(55C) 0.9600

C(56)–H(56A) 0.9600 C(56)–H(56B) 0.9600 C(56)–H(56C) 0.9600

C(81)–C(82) 1.400(9) C(82)–C(83) 1.385(11) C(83)–C(84) 1.354(13)

C(84)–C(85) 1.379(13)C(85)–C(86) 1.407(11)C(81)–C(86) 1.380(10)

C(87)–C(88) 1.389(10) C(88)–C(89) 1.389(12) C(89)–C(90) 1.374(15)

C(90)–C(91) 1.372(15)C(91)–C(92) 1.385(11)C(87)–C(92) 1.386(10)

C(82)–H(82)0.9300C(83)–H(83) 0.9300 C(84)–H(84)0.9300

C(85)–H(85) 0.9300 C(86)–H(86)0.9300

C(88)–H(88)0.9300C(89)–H(89) 0.9300 C(90)–H(90)0.9300

C(91)–H(91) 0.9300 C(92)–H(92)0.9300

C(93)–H(93A)0.9600C(93)–H(93B) 0.9600 C(93)–H(93C)0.9600

B(1)–F(1) 1.314(12)B(1)–F(2) 1.314(18)

B(1)–F(3) 1.289(16) B(1)–F(4) 1.279(13)

B(2)–F(5) 1.287(13)B(2)–F(6) 1.285(12)

B(2)–F(7) 1.306(13) B(2)–F(8A) 1.395(16)B(2)–F(8B) 1.45(2)

O(98)–C(99)1.368(15)O(98)–H(98) 0.8200

C(99)–H(99A)0.9600C(99)–H(99B) 0.9600 C(99)–H(99C)0.9600

S(1)–Co(1)–S(2) 76.23(7)S(2)–Co(1)–S(3) 107.42(7)

S(1)–Co(1)–S(3) 176.07(8)S(2)–Co(1)–S(4) 174.75(8)

S(1)–Co(1)–S(4) 99.96(7)S(3)–Co(1)–S(4) 76.48(7)

S(1)–Co(1)–P(1) 94.84(7)S(1)–Co(1)–P(2) 87.02(7)

S(2)–Co(1)–P(1) 80.57(7) S(2)–Co(1)–P(2) 94.07(7)

S(3)–Co(1)–P(1) 87.28(7)S(3)–Co(1)–P(2) 91.22(7)

S(4)–Co(1)–P(1) 96.29(7) S(4)–Co(1)–P(2) 89.30(7)

P(1)–Co(1)–P(2) 173.71(7)

C(1)–S(1)–Co(1) 86.9(2)C(4)–S(3)–Co(1) 86.9(2)

C(1)–S(2)–Co(1) 86.8(2) C(4)–S(4)–Co(1) 86.9(2)

O(1)–P(1)–Co(1) 117.7(2)O(4)–P(2)–Co(1) 111.55(19)

C(11)–P(1)–Co(1) 115.7(2)C(31)–P(2)–Co(1) 116.4(2)

C(17)–P(1)–Co(1) 116.3(2)C(37)–P(2)–Co(1) 111.6(2)

O(1)–P(1)–C(11) 97.1(3)O(4)–P(2)–C(31) 102.9(3)

O(1)–P(1)–C(17) 103.1(3)O(4)–P(2)–C(37) 104.6(3)

C(11)–P(1)–C(17) 104.2(3)C(31)–P(2)–C(37) 108.8(4)

P(1)–O(1)–C(23) 125.1(4)P(2)–O(4)–C(43) 121.4(5)

C(1)–N(1)–C(2) 120.8(6)C(4)–N(2)–C(5) 121.1(6)

C(1)–N(1)–C(3) 121.7(6)C(4)–N(2)–C(6) 122.2(6)

C(2)–N(1)–C(3) 117.4(6)C(5)–N(2)–C(6) 116.7(6)

N(1)–C(1)–S(1) 126.2(5) N(2)–C(4)–S(3) 124.6(5)

N(1)–C(1)–S(2) 123.7(5) N(2)–C(4)–S(4) 125.7(5)

S(1)–C(1)–S(2) 110.1(4) S(3)–C(4)–S(4) 109.7(4)

P(1)–C(17)–C(18) 124.1(5) P(2)–C(37)–C(38) 122.6(7)

P(1)–C(17)–C(22) 118.4(5) P(2)–C(37)–C(42) 118.0(6)

C(18)–C(17)–C(22) 117.5(6)C(38)–C(37)–C(42) 118.8(8)

C(17)–C(18)–C(19) 121.4(6) C(37)–C(38)–C(39) 120.2(10)

C(18)–C(19)–C(20) 120.3(7) C(38)–C(39)–C(40) 120.0(12)

C(19)–C(20)–C(21) 120.0(7) C(39)–C(40)–C(41) 119.0(12)

C(20)–C(21)–C(22) 119.7(7)C(40)–C(41)–C(42) 122.2(13)

C(21)–C(22)–C(17) 121.1(7) C(41)–C(42)–C(37) 119.8(10)

N(1)–C(2)–H(2A) 109.5 N(2)–C(5)–H(5A) 109.5

N(1)–C(2)–H(2B) 109.5 N(2)–C(5)–H(5B) 109.5

N(1)–C(2)–H(2C) 109.5 N(2)–C(5)–H(5C) 109.5

H(2A)–C(2)–H(2B) 109.5 H(5A)–C(5)–H(5B) 109.5

H(2A)–C(2)–H(2C) 109.5 H(5A)–C(5)–H(5C) 109.5

H(2B)–C(2)–H(2C) 109.5 H(5B)–C(5)–H(5C) 109.5

N(1)–C(3)–H(3A) 109.5 N(2)–C(6)–H(6A) 109.5

N(1)–C(3)–H(3B) 109.5 N(2)–C(6)–H(6B) 109.5

N(1)–C(3)–H(3C) 109.5 N(2)–C(6)–H(6C) 109.5

H(3A)–C(3)–H(3B) 109.5 H(6A)–C(6)–H(6B) 109.5

H(3A)–C(3)–H(3C) 109.5 H(6A)–C(6)–H(6C) 109.5

H(3B)–C(3)–H(3C) 109.5 H(6B)–C(6)–H(6C) 109.5

C(11)–C(12)–H(12) 119.6C(31)–C(32)–H(32) 119.6

C(13)–C(12)–H(12) 119.6 C(33)–C(32)–H(32) 119.6

C(12)–C(13)–H(13) 120.2C(32)–C(33)–H(33) 120.4

C(14)–C(13)–H(13) 120.2 C(34)–C(33)–H(33) 120.4

C(13)–C(14)–H(14) 119.7C(33)–C(34)–H(34) 119.2

C(15)–C(14)–H(14) 119.7 C(35)–C(34)–H(34) 119.2

C(14)–C(15)–H(15) 120.1C(34)–C(35)–H(35) 120.3

C(16)–C(15)–H(15) 120.1 C(36)–C(35)–H(35) 120.3

C(15)–C(16)–H(16) 119.7C(35)–C(36)–H(36) 119.8

C(11)–C(16)–H(16) 119.7 C(31)–C(36)–H(36) 119.8

C(17)–C(18)–H(18) 119.3C(37)–C(38)–H(38) 119.9

C(19)–C(18)–H(18) 119.3 C(39)–C(38)–H(38) 119.9

C(18)–C(19)–H(19) 119.8C(38)–C(39)–H(39) 120.0

C(20)–C(19)–H(19) 119.8 C(40)–C(39)–H(39) 120.0

C(19)–C(20)–H(20) 120.0C(39)–C(40)–H(40) 120.5

C(21)–C(20)–H(20) 120.0 C(41)–C(40)–H(40) 120.5

C(20)–C(21)–H(21) 120.2C(40)–C(41)–H(41) 118.9

C(22)–C(21)–H(21) 120.2 C(42)–C(41)–H(41) 118.9

C(21)–C(22)–H(22) 119.4C(41)–C(42)–H(42) 120.1

C(17)–C(22)–H(22) 119.4 C(37)–C(42)–H(42) 120.1

O(1)–C(23)–H(23A) 109.5 O(4)–C(43)–H(43A) 109.5

O(1)–C(23)–H(23B) 109.5 O(4)–C(43)–H(43B) 109.5

O(1)–C(23)–H(23C) 109.5 O(4)–C(43)–H(43C) 109.5

H(23A)–C(23)–H(23B) 109.5 H(43A)–C(43)–H(43B) 109.5

H(23A)–C(23)–H(23C) 109.5 H(43A)–C(43)–H(43C) 109.5

H(23B)–C(23)–H(23C) 109.5 H(43B)–C(43)–H(43C) 109.5

S(51)–Co(51)–S(52) 76.08(6)S(53)–Co(52)–S(54) 76.90(6)

S(51)–Co(51)–P(51) 93.47(6)S(53)–Co(52)–P(52) 94.15(6)

S(52)–Co(51)–P(51) 85.27(6) S(54)–Co(52)–P(52) 87.26(6)

C(51)–S(51)–Co(51) 86.7(2)C(54)–S(53)–Co(52) 86.3(2)

C(51)–S(52)–Co(51) 86.8(2) C(54)–S(54)–Co(52) 86.3(2)

O(51)–P(51)–Co(51) 116.3(2)O(54)–P(52)–Co(52) 109.76(17)

C(61)–P(51)–Co(51) 113.9(2)C(81)–P(52)–Co(52) 112.9(2)

C(67)–P(51)–Co(51) 118.0(2)C(87)–P(52)–Co(52) 118.2(2)

O(51)–P(51)–C(61) 97.7(3)O(54)–P(52)–C(81) 104.0(3)

O(51)–P(51)–C(67) 104.2(3)O(54)–P(52)–C(87) 102.8(3)

C(61)–P(51)–C(67) 104.1(3)C(81)–P(52)–C(87) 107.8(3)

P(51)–O(51)–C(73) 128.1(6)P(52)–O(54)–C(93) 121.1(4)

C(51)–N(51)–C(52) 121.7(6)C(54)–N(52)–C(55) 122.1(6)

C(51)–N(51)–C(53) 120.3(6)C(54)–N(52)–C(56) 121.7(7)

C(52)–N(51)–C(53) 117.9(6)C(55)–N(52)–C(56) 116.2(6)

P(1)–C(11)–C(12) 122.7(5) P(2)–C(31)–C(32) 117.3(6)

P(1)–C(11)–C(16) 118.7(5) P(2)–C(31)–C(36) 124.1(6)

C(12)–C(11)–C(16) 118.5(6)C(32)–C(31)–C(36) 118.5(7)

C(11)–C(12)–C(13) 120.8(7) C(31)–C(32)–C(33) 120.8(9)

C(12)–C(13)–C(14) 119.6(8) C(32)–C(33)–C(34) 119.3(10)

C(13)–C(14)–C(15) 120.5(8) C(33)–C(34)–C(35) 121.6(10)

C(14)–C(15)–C(16) 119.9(8)C(34)–C(35)–C(36) 119.5(11)

C(15)–C(16)–C(11) 120.6(8) C(35)–C(36)–C(31) 120.4(10)

N(51)–C(51)–S(51) 124.4(5) N(52)–C(54)–S(53) 125.2(5)

N(51)–C(51)–S(52) 125.2(5) N(52)–C(54)–S(54) 124.3(5)

S(51)–C(51)–S(52) 110.4(3) S(53)–C(54)–S(54) 110.5(4)

P(51)–C(61)–C(62) 122.2(5) P(52)–C(81)–C(82) 118.2(5)

P(51)–C(61)–C(66) 119.0(6) P(52)–C(81)–C(86) 122.9(6)

C(62)–C(61)–C(66) 118.5(7)C(82)–C(81)–C(86) 118.4(7)

C(61)–C(62)–C(63) 120.8(8) C(81)–C(82)–C(83) 119.9(8)

C(62)–C(63)–C(64) 119.4(9) C(82)–C(83)–C(84) 122.3(9)

C(63)–C(64)–C(65) 120.8(8) C(83)–C(84)–C(85) 118.4(9)

C(64)–C(65)–C(66) 120.3(9)C(84)–C(85)–C(86) 120.9(9)

C(65)–C(66)–C(61) 120.1(8) C(85)–C(86)–C(81) 120.0(8)

P(51)–C(67)–C(68) 124.2(5) P(52)–C(87)–C(88) 117.6(6)

P(51)–C(67)–C(72) 118.4(5) P(52)–C(87)–C(92) 125.0(6)

C(68)–C(67)–C(72) 117.3(6)C(88)–C(87)–C(92) 117.5(7)

C(67)–C(68)–C(69) 121.7(7) C(87)–C(88)–C(89) 121.4(9)

C(68)–C(69)–C(70) 120.1(8) C(88)–C(89)–C(90) 119.9(10)

C(69)–C(70)–C(71) 119.5(7) C(89)–C(90)–C(91) 119.7(9)

C(70)–C(71)–C(72) 120.5(8)C(90)–C(91)–C(92) 120.3(10)

C(71)–C(72)–C(67) 120.9(8) C(91)–C(92)–C(87) 121.3(9)

N(51)–C(52)–H(52A) 109.5 N(52)–C(55)–H(55A) 109.5

N(51)–C(52)–H(52B) 109.5 N(52)–C(55)–H(55B) 109.5

N(51)–C(52)–H(52C) 109.5 N(52)–C(55)–H(55C) 109.5

H(52A)–C(52)–H(52B) 109.5 H(55A)–C(55)–H(55B) 109.5

H(52A)–C(52)–H(52C) 109.5 H(55A)–C(55)–H(55C) 109.5

H(52B)–C(52)–H(52C) 109.5 H(55B)–C(55)–H(55C) 109.5

N(51)–C(53)–H(53A) 109.5 N(52)–C(56)–H(56A) 109.5

N(51)–C(53)–H(53B) 109.5 N(52)–C(56)–H(56B) 109.5

N(51)–C(53)–H(53C) 109.5 N(52)–C(56)–H(56C) 109.5

H(53A)–C(53)–H(53B) 109.5 H(56A)–C(56)–H(56B) 109.5

H(53A)–C(53)–H(53C) 109.5 H(56A)–C(56)–H(56C) 109.5

H(53B)–C(53)–H(53C) 109.5 H(56B)–C(56)–H(56C) 109.5

C(61)–C(62)–H(62) 119.6C(81)–C(82)–H(82) 120.1

C(63)–C(62)–H(62) 119.6 C(83)–C(82)–H(82) 120.1

C(62)–C(63)–H(63) 120.3C(82)–C(83)–H(83) 118.8

C(64)–C(63)–H(63) 120.3 C(84)–C(83)–H(83) 118.8

C(63)–C(64)–H(64) 119.6C(83)–C(84)–H(84) 120.8

C(65)–C(64)–H(64) 119.6 C(85)–C(84)–H(84) 120.8

C(64)–C(65)–H(65) 119.9C(84)–C(85)–H(85) 119.5

C(66)–C(65)–H(65) 119.9 C(86)–C(85)–H(85) 119.5

C(65)–C(66)–H(66) 120.0C(85)–C(86)–H(86) 120.0

C(61)–C(66)–H(66) 120.0 C(81)–C(86)–H(86) 120.0

C(67)–C(68)–H(68) 119.2C(87)–C(88)–H(88) 119.3

C(69)–C(68)–H(68) 119.2 C(89)–C(88)–H(88) 119.3

C(68)–C(69)–H(69) 120.0C(88)–C(89)–H(89) 120.1

C(70)–C(69)–H(69) 120.0 C(90)–C(89)–H(89) 120.1

C(69)–C(70)–H(70) 120.2C(89)–C(90)–H(90) 120.1

C(71)–C(70)–H(70) 120.2 C(91)–C(90)–H(90) 120.1

C(70)–C(71)–H(71) 119.8C(90)–C(91)–H(91) 119.9

C(72)–C(71)–H(71) 119.8 C(92)–C(91)–H(91) 119.9

C(71)–C(72)–H(72) 119.5C(91)–C(92)–H(92) 119.4

C(67)–C(72)–H(72) 119.5 C(87)–C(92)–H(92) 119.4

O(51)–C(73)–H(73A) 109.5 O(54)–C(93)–H(93A) 109.5

O(51)–C(73)–H(73B) 109.5 O(54)–C(93)–H(93B) 109.5

O(51)–C(73)–H(73C) 109.5 O(54)–C(93)–H(93C) 109.5

H(73A)–C(73)–H(73B) 109.5 H(93A)–C(93)–H(93B) 109.5

H(73A)–C(73)–H(73C) 109.5 H(93A)–C(93)–H(93C) 109.5

H(73B)–C(73)–H(73C) 109.5 H(93B)–C(93)–H(93C) 109.5

F(1)–B(1)–F(2) 104.8(14) F(5)–B(2)–F(6) 124.1(11)

F(1)–B(1)–F(3) 116.7(15) F(5)–B(2)–F(7) 118.0(12)

F(1)–B(1)–F(4) 113.5(11) F(5)–B(2)–F(8A) 98.6(10)

F(2)–B(1)–F(3) 100.7(12) F(6)–B(2)–F(7) 112.6(11)

F(2)–B(1)–F(4) 104.0(16) F(6)–B(2)–F(8A) 105.8(13)

F(3)–B(1)–F(4) 114.8(12) F(7)–B(2)–F(8A) 87.8(12)

F(5)–B(2)–F(8B) 76.4(13)

F(6)–B(2)–F(8B) 94.3(14)

F(7)–B(2)–F(8B) 76.4(14)

F(8A7)–B(2)–F(8B) 158.2(16)

C(99)–O(98)–H(98) 109.5

O(98)–C(99)–H(99A) 109.5 H(99A)–C(99)–H(99B) 109.5

O(98)–C(99)–H(99B) 109.5 H(99A)–C(99)–H(99C) 109.5

O(98)–C(99)–H(99C) 109.5 H(99B)–C(99)–H(99C) 109.5

——————————————————————————————————————
