# Supplementary material for: Syntheses, crystal structures and isomerization kinetics of a series of [Co(dtc)2{P(OMe)3 − nPhn}2]+(n = 0–2) complexes (dtc−= N,N-dimethyldithiocarbamate): role of σ-donicity, π-acidity, and cone angle of the P-ligands in the trans influence and trans effect
Source: Royal Society of Chemistry journal article supplement (doi:10.1039/b301712e), 2003-01-01
Supplement: s1.pdf [file s1.pdf]

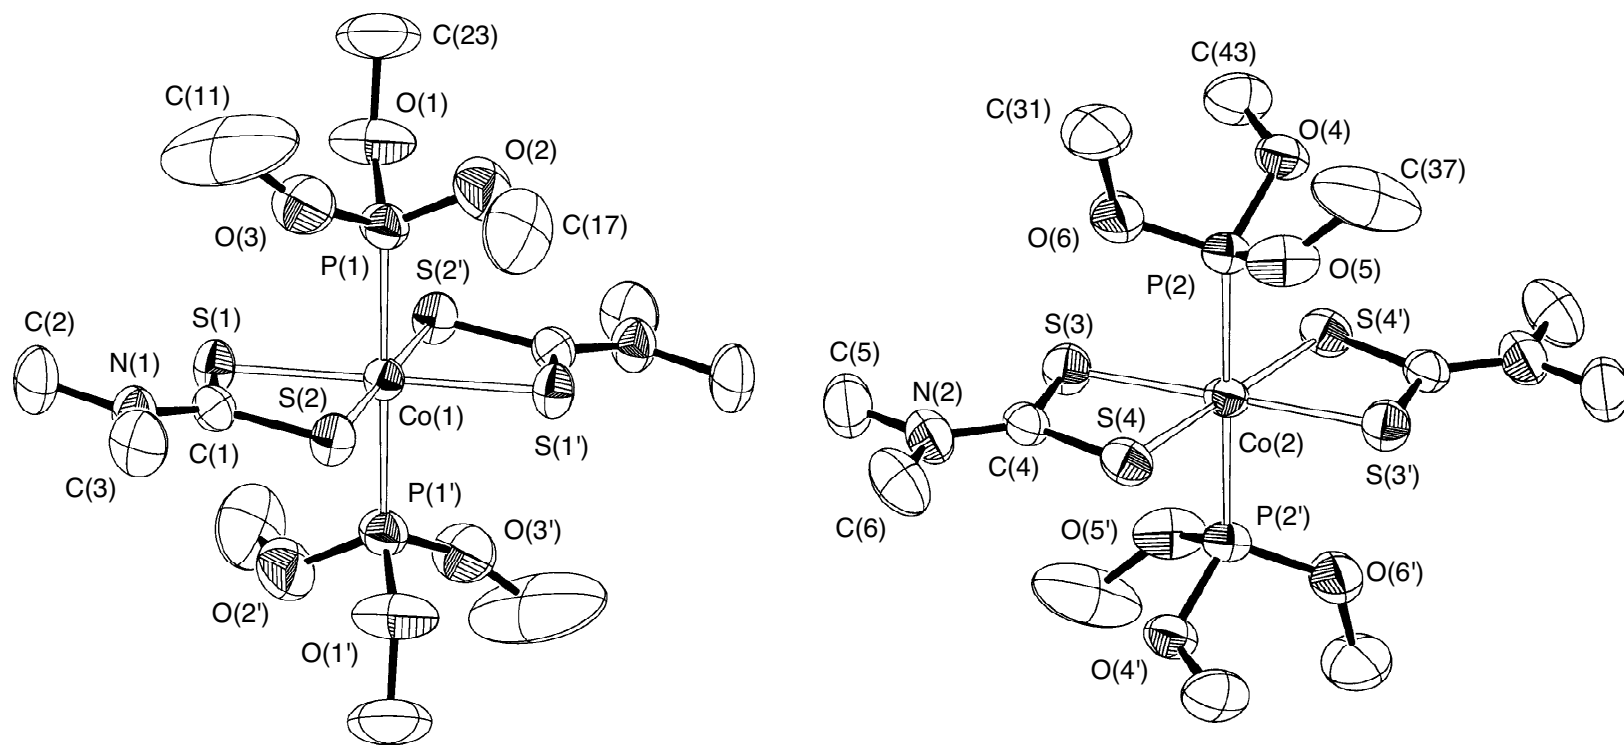

**Figure S1.** Perspective drawings (40% probability level) of two cationic complexes in  $trans$ -[Co(dtc)<sub>2</sub>{P(OMe)<sub>3</sub>}<sub>2</sub>]BF<sub>4</sub>. Hydrogen atoms are omitted for clarity.
