# Supplementary material for: Syntheses, crystal structures and isomerization kinetics of a series of [Co(dtc)2{P(OMe)3 − nPhn}2]+(n = 0–2) complexes (dtc−= N,N-dimethyldithiocarbamate): role of σ-donicity, π-acidity, and cone angle of the P-ligands in the trans influence and trans effect
Source: Royal Society of Chemistry journal article supplement (doi:10.1039/b301712e), 2003-01-01
Supplement: s2.pdf [file s2.pdf]

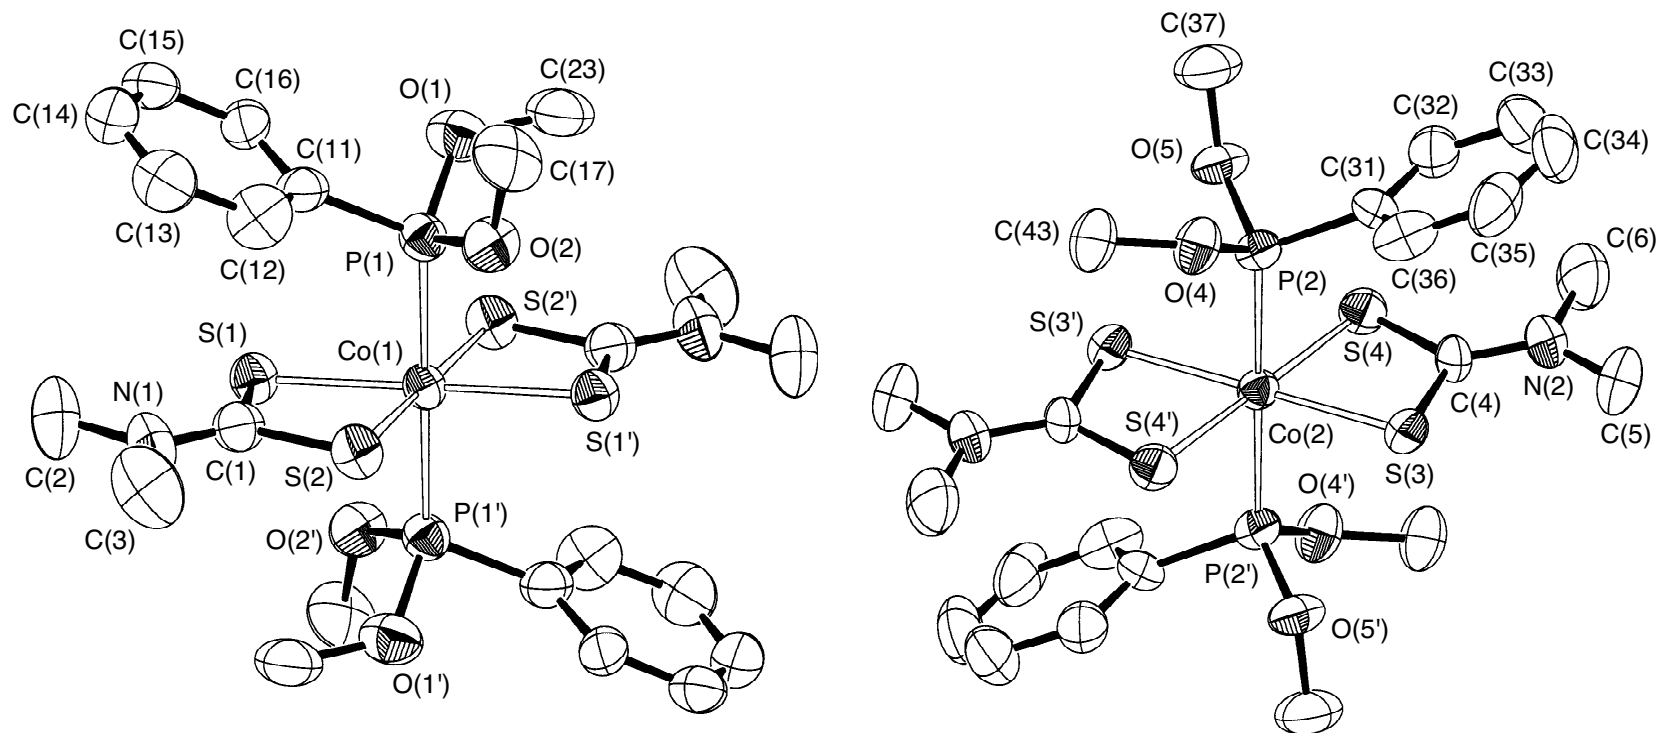

**Figure S2.** Perspective drawings (50% probability level) of two cationic complexes in  $trans$ -[Co(dtc)<sub>2</sub>{P(OMe)<sub>2</sub>Ph}<sub>2</sub>]BF<sub>4</sub>·(CH<sub>3</sub>)<sub>2</sub>CO. Hydrogen atoms are omitted for clarity.
