# Supplementary material for: Syntheses, crystal structures and isomerization kinetics of a series of [Co(dtc)2{P(OMe)3 − nPhn}2]+(n = 0–2) complexes (dtc−= N,N-dimethyldithiocarbamate): role of σ-donicity, π-acidity, and cone angle of the P-ligands in the trans influence and trans effect
Source: Royal Society of Chemistry journal article supplement (doi:10.1039/b301712e), 2003-01-01
Supplement: s3a.pdf [file s3a.pdf]

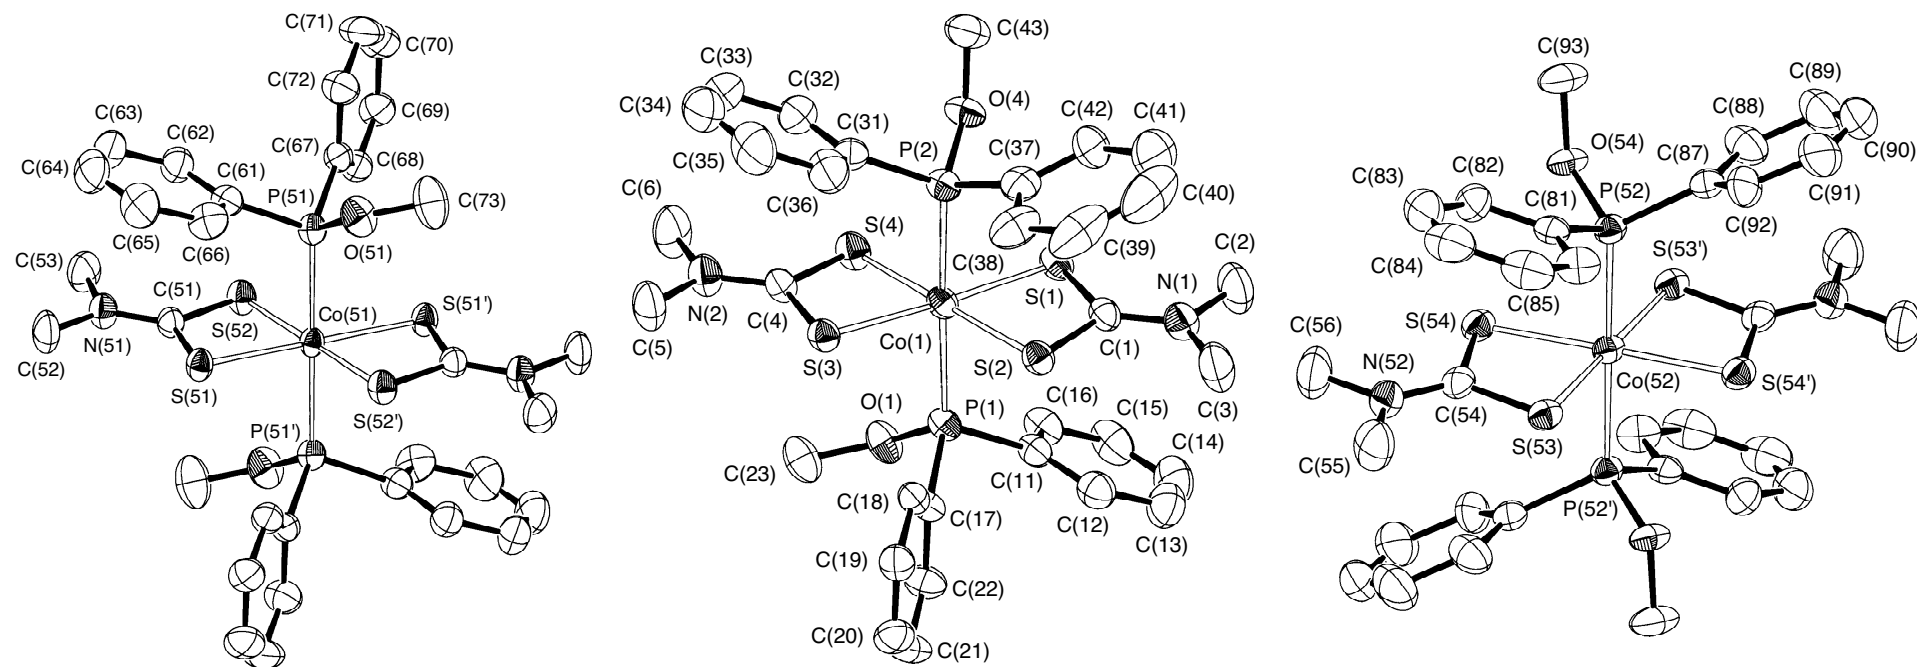

**Figure S3a.** Perspective drawings (40% probability level) of three cationic complexes in *trans*-[Co(dtc)<sub>2</sub>{P(OMe)Ph<sub>2</sub>}<sub>2</sub>]BF<sub>4</sub>·0.5CH<sub>3</sub>OH. Hydrogen atoms are omitted for clarity.
