# Supplementary figures and images for: Syntheses, crystal structures and isomerization kinetics of a series of [Co(dtc)2{P(OMe)3 − nPhn}2]+(n = 0–2) complexes (dtc−= N,N-dimethyldithiocarbamate): role of σ-donicity, π-acidity, and cone angle of the P-ligands in the trans influence and trans effect
Source: Royal Society of Chemistry journal article supplement (doi:10.1039/b301712e), 2003-01-01

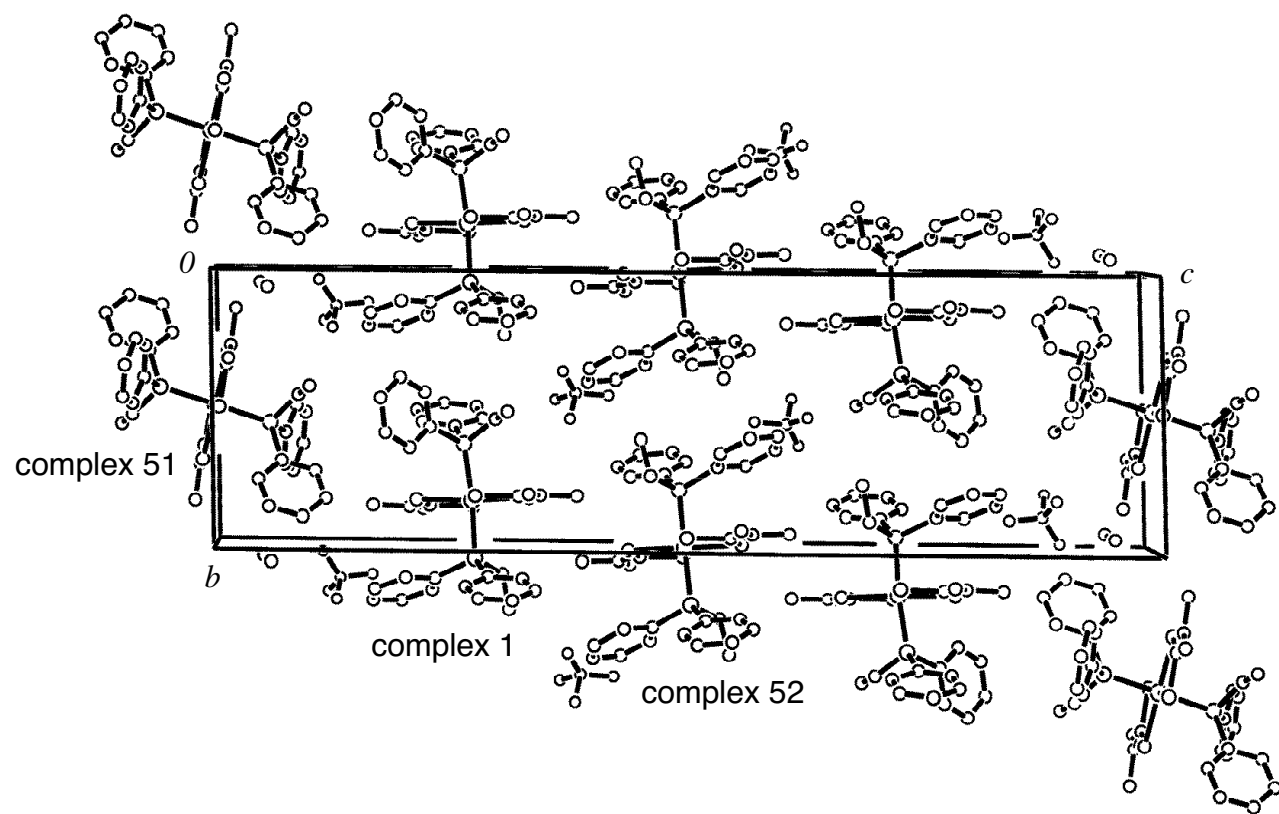

**Figure S3b.** Packing diagram of  $trans-[Co(dtc)_2\{P(OMe)Ph_2\}_2]BF_4 \cdot 0.5 \cdot CH_3OH$

Supplement: s3b.pdf [file s3b.pdf]
